# Supplementary material
Source: PubMed Central journal article supplement (PMC4011007)
Supplement: JB.01502-14_zjb999093144so1.pdf [file JB.01502-14_zjb999093144so1.pdf]

**A** *Acanthamoeba castellanii*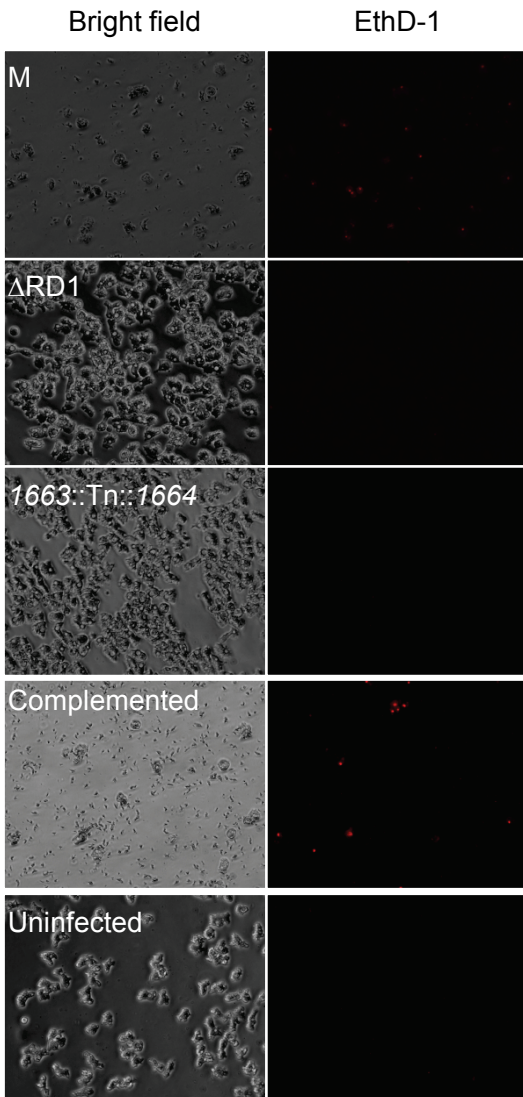**B**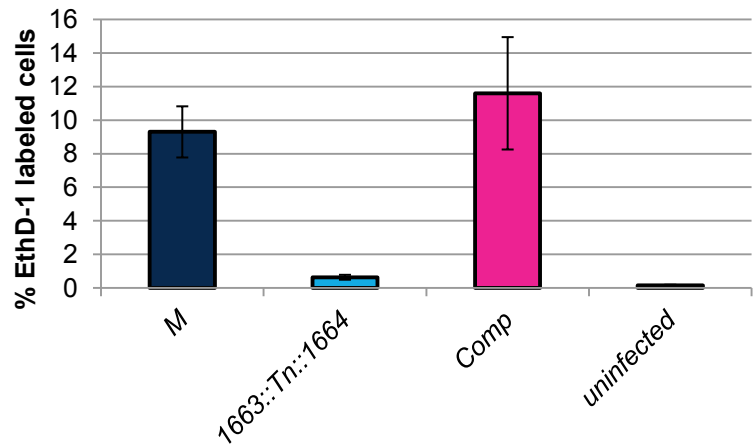**C**

| Strain         | Unstained Cells | Stained Cells | Total Cells |
|----------------|-----------------|---------------|-------------|
| M              | 220             | 23            | 243         |
| 1663::Tn::1664 | 1498            | 9             | 1507        |
| Comp           | 1416            | 184           | 1600        |
| Uninfected     | 1908            | 3             | 1911        |

**FIGURE S1: The *MMAR\_1663-1668* region of the *M. marinum* genome is required for virulence. **A.** *M. marinum* infection of *A. castellanii*. **B.** Infections were performed at an MOI of 10. Images were acquired 24 hours-post infection with a 20X objective on a Zeiss Axio-Observer Microscope. Scale bars = 20 $\mu$ m. EthD-1 staining showed membrane permeabilization of the amoebae, resulting in red fluorescence. **B.** Quantitation of the average % EthD-1 stained cells per field. Red EthD1-stained cells and total cells per field were counted; 2 independent fields from each infection were counted and the counts were averaged. Error bars indicate the standard deviation between fields. **C.** Absolute counts from B, indicating the live (unstained) and the dead (stained) amoebae.**

## S2. List of MRM transitions used in this study

| Q1 m/z  | Q3 m/z  | Protein_Peptide_Transition      | CE (v) |
|---------|---------|---------------------------------|--------|
| 571.817 | 943.532 | CFP10_GAAGTAAQAQAVR.T1          | 33.6   |
| 571.817 | 785.463 | CFP10_GAAGTAAQAQAVR.T2          | 33.6   |
| 571.817 | 714.426 | CFP10_GAAGTAAQAQAVR.T3          | 33.6   |
| 673.336 | 945.49  | CFP10_TQIDQVESTAGSLQAQWR.T1     | 38.7   |
| 673.336 | 688.352 | CFP10_TQIDQVESTAGSLQAQWR.T2     | 38.7   |
| 673.336 | 888.469 | CFP10_TQIDQVESTAGSLQAQWR.T3     | 38.7   |
| 827.854 | 999.438 | CFP10_ADDEQQQALSSQMGEF.T1       | 46.4   |
| 827.854 | 886.354 | CFP10_ADDEQQQALSSQMGEF.T2       | 46.4   |
| 827.854 | 840.392 | CFP10_ADDEQQQALSSQMGEF.T3       | 46.4   |
| 829.406 | 915.501 | ESAT6_GVQQNWDSTAQELNNSLQNLAR.T1 | 46.5   |
| 829.406 | 801.458 | ESAT6_GVQQNWDSTAQELNNSLQNLAR.T2 | 46.5   |
| 829.406 | 714.426 | ESAT6_GVQQNWDSTAQELNNSLQNLAR.T3 | 46.5   |
| 465.9   | 682.3   | ESAT6_LAAAWGGSGSEAYR.Light.T1   | 20     |
| 465.9   | 538.3   | ESAT6_LAAAWGGSGSEAYR.Light.T2   | 20     |
| 465.9   | 769.35  | ESAT6_LAAAWGGSGSEAYR.Light.T3   | 20     |
| 469.227 | 692.315 | ESAT6_LAAAWGGSGSEAYR.Heavy.T1   | 20     |
| 469.227 | 548.262 | ESAT6_LAAAWGGSGSEAYR.Heavy.T2   | 20     |
| 469.227 | 779.347 | ESAT6_LAAAWGGSGSEAYR.Heavy.T3   | 20     |
| 508.611 | 556.32  | GroES_EKPQEGTWAVGPGR.Light.T1   | 22     |
| 508.611 | 869.436 | GroES_EKPQEGTWAVGPGR.Light.T2   | 22     |
| 508.611 | 655.389 | GroES_EKPQEGTWAVGPGR.Light.T3   | 22     |
| 511.944 | 566.32  | GroES_EKPQEGTWAVGPGR.Heavy.T1   | 22     |
| 511.944 | 869.436 | GroES_EKPQEGTWAVGPGR.Heavy.T2   | 22     |
| 511.944 | 665.389 | GroES_EKPQEGTWAVGPGR.Heavy.T3   | 22     |
| 630.7   | 852.469 | EsxN_TINYQFGDVDAHGALIR.T1       | 36     |
| 630.7   | 951.537 | EsxN_TINYQFGDVDAHGALIR.T2       | 36     |
| 630.7   | 737.442 | EsxN_TINYQFGDVDAHGALIR.T3       | 36     |
| 685.85  | 964.55  | GROES_YGGEEYLILSAR.T1           | 39.3   |
| 685.85  | 835.5   | GROES_YGGEEYLILSAR.T2           | 39.3   |
| 888.92  | 1217.58 | GroEL2_DETTIVEGAGDSDAIAGR.T1    | 45     |
| 888.92  | 1118.51 | GroEL2_DETTIVEGAGDSDAIAGR.T2    | 45     |
| 573.295 | 1220.62 | 2929_TPDAIAQDIHTTLGEK.Heavy.3T1 | 30     |
| 573.295 | 1149.59 | 2929_TPDAIAQDIHTTLGEK.Heavy.3T2 | 30     |
| 573.295 | 1021.53 | 2929_TPDAIAQDIHTTLGEK.Heavy.3T3 | 30     |
| 570.625 | 1212.62 | 2929_TPDAIAQDIHTTLGEK.Light.3T1 | 30     |
| 570.625 | 1141.59 | 2929_TPDAIAQDIHTTLGEK.Light.3T2 | 30     |
| 570.625 | 1013.53 | 2929_TPDAIAQDIHTTLGEK.Light.3T3 | 30     |

### S3. MRM transition exemplars

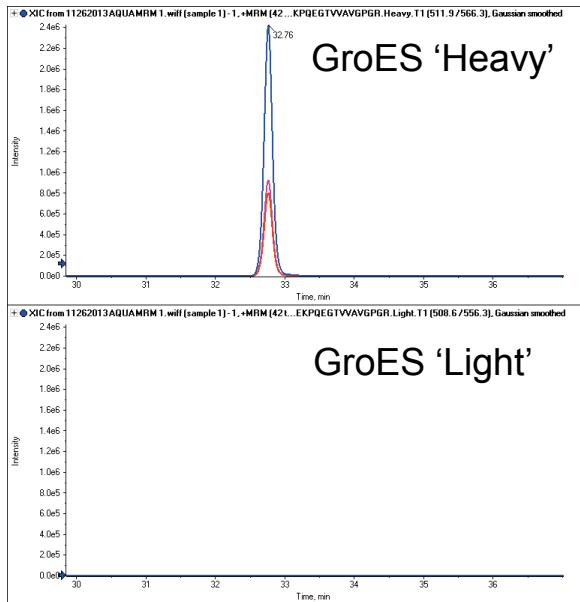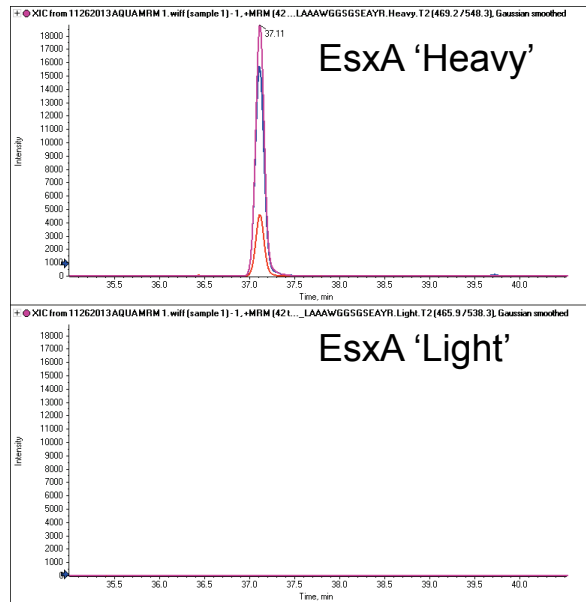

Neat injection of  $^{13}\text{C}^{15}\text{N}$  peptides (Cross Talk/Purity test). Shown here are chromatograms from an injection of synthesized heavy stable heavy-isotope versions of tryptic peptides from GroES (Left) and EsxA (Right). Shown on the bottom are chromatograms from the channel specific to the light (endogenous) form of EsxA and GroES. As illustrated here, a clean injection of the heavy-peptides generates no detectable signal for the corresponding light ones.

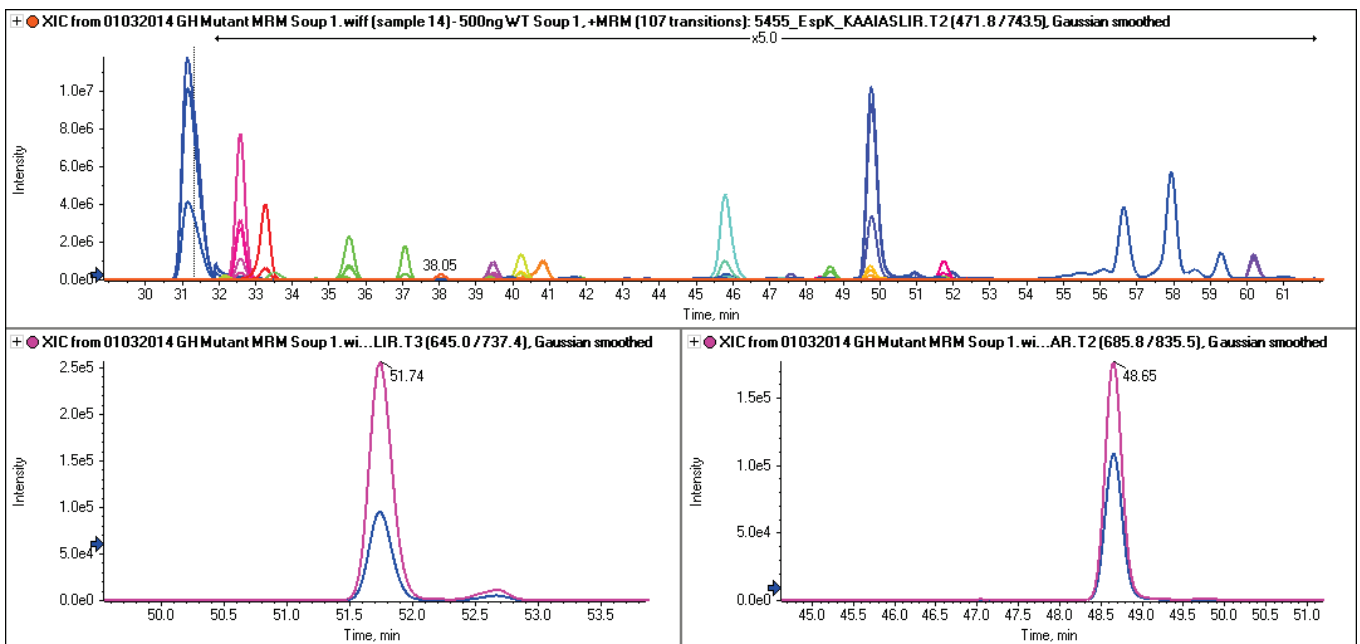

LC/MS/MS Chromatogram from WT (Culture filtrate). Expanded region to highlight peak detail (EsxB) peak on left is unscaled. Insets illustrate two typical peaks from (EsxB) left and (GroES) right.

## S4. Measured MRM peak areas for cell lysate and culture filtrate analysis

### Cell Lysate Data 1/1

| Plt  | Sample          | Errors   | Area Ratios         | Graph Av  |      |                 |          |                                 |          |  |  |
|------|-----------------|----------|---------------------|-----------|------|-----------------|----------|---------------------------------|----------|--|--|
|      | CFP10 Peptide 1 |          | CFP10_GAAGTAAQAAVVR |           |      | ESAT6_Peptide 1 |          | ESAT6_GVQQNWDSTAQELNNSLQNLAR.T1 |          |  |  |
|      |                 |          | Area/GroEL2         |           |      |                 |          |                                 |          |  |  |
|      | Area            |          | Area Ratio          |           |      | Area            |          | Area Ratio                      |          |  |  |
| RD1  | 2.58E+05        | 2.58E+05 | 1.04E+00            | 1.03E+00  | RD1  | 0               |          | 0                               |          |  |  |
| RD1  | 2.69E+05        | 10605.66 | 1.28E+00            | 0.2513962 | RD1  | 0               |          | 0                               |          |  |  |
| RD1  | 2.48E+05        | 4%       | 7.77E-01            | 24%       | RD1  | 0               |          | 0                               |          |  |  |
| 14   | 2.07E+07        | 1.94E+07 | 2.76E+01            | 2.91E+01  | 14   | 1.39E+06        | 1.29E+06 | 2.14E+00                        | 2.20E+00 |  |  |
| 14   | 2.05E+07        | 2140397  | 3.16E+01            | 2.17086   | 14   | 1.20E+06        | 94659.04 | 2.05E+00                        | 0.181698 |  |  |
| 14   | 1.69E+07        | 11%      | 2.82E+01            | 7%        | 14   | 1.30E+06        | 7%       | 2.40E+00                        | 8%       |  |  |
| Comp | 2.16E+07        | 1.88E+07 | 2.30E+01            | 2.64E+01  | Comp | 1.33E+06        | 1.35E+06 | 1.80E+00                        | 2.16E+00 |  |  |
| Comp | 1.69E+07        | 2466218  | 2.73E+01            | 3.0107972 | Comp | 1.29E+06        | 65911.56 | 2.19E+00                        | 0.346454 |  |  |
| Comp | 1.79E+07        | 13%      | 2.89E+01            | 11%       | Comp | 1.42E+06        | 5%       | 2.49E+00                        | 16%      |  |  |
| WT   | 2.34E+07        | 2.50E+07 | 3.96E+01            | 3.71E+01  | WT   | 2.03E+06        | 2.09E+06 | 3.80E+00                        | 3.60E+00 |  |  |
| WT   | 2.66E+07        | 1575447  | 3.55E+01            | 2.2219436 | WT   | 2.04E+06        | 85912.75 | 3.17E+00                        | 0.37177  |  |  |
| WT   | 2.50E+07        | 6%       | 3.61E+01            | 6%        | WT   | 2.19E+06        | 4%       | 3.83E+00                        | 10%      |  |  |

|      | GROES_YGGEYLLSAR.T2 |          | 2929_TPDAIAQDIHTTLGK.Light.3T3 |            | ESAT6_LAAAWGGSGSEAYR.Light.T2 |          |          |      |          |          |
|------|---------------------|----------|--------------------------------|------------|-------------------------------|----------|----------|------|----------|----------|
|      | Area                |          | Area                           | Area Ratio | Area Ratio Heavy              |          |          |      |          |          |
| RD1  | 1.74E+07            | 1.59E+07 | RD1                            | 8.13E+05   | 7.01E+05                      | 3.29E+00 | 2.95E+00 | RD1  | 0.00E+00 |          |
| RD1  | 1.45E+07            | 1495404  | RD1                            | 6.44E+05   | 97228.31                      | 3.15E+00 | 0.471216 | RD1  | 0.00E+00 |          |
| RD1  | 1.57E+07            | 9%       | RD1                            | 6.46E+05   | 14%                           | 2.41E+00 | 16%      | RD1  | 0.00E+00 |          |
| 14   | 1.94E+07            | 1.84E+07 | 14                             | 1.28E+06   | 1.16E+06                      | 1.97E+00 | 1.96E+00 | 14   | 7.06E-01 | 7.22E-01 |
| 14   | 1.90E+07            | 1346006  | 14                             | 1.27E+06   | 185353.3                      | 2.16E+00 | 0.206182 | 14   | 7.49E-01 | 0.023378 |
| 14   | 1.69E+07            | 7%       | 14                             | 9.50E+05   | 16%                           | 1.75E+00 | 11%      | 14   | 7.10E-01 | 3%       |
| Comp | 1.92E+07            | 1.81E+07 | Comp                           | 1.44E+06   | 1.31E+06                      | 1.95E+00 | 2.08E+00 | Comp | 7.71E-01 | 7.53E-01 |
| Comp | 1.75E+07            | 966040   | Comp                           | 1.22E+06   | 117741.2                      | 2.06E+00 | 0.147927 | Comp | 7.27E-01 | 0.022514 |
| Comp | 1.76E+07            | 5%       | Comp                           | 1.28E+06   | 9%                            | 2.24E+00 | 7%       | Comp | 7.60E-01 | 3%       |
| WT   | 1.77E+07            | 1.73E+07 | WT                             | 1.49E+06   | 1.49E+06                      | 2.79E+00 | 2.56E+00 | WT   | 1.42E+00 | 1.45E+00 |
| WT   | 1.76E+07            | 689661.8 | WT                             | 1.48E+06   | 7023.769                      | 2.30E+00 | 0.250632 | WT   | 1.39E+00 | 0.082601 |
| WT   | 1.65E+07            | 4%       | WT                             | 1.49E+06   | 0%                            | 2.60E+00 | 10%      | WT   | 1.55E+00 | 6%       |

Shown here are the raw peak areas (and peak area ratios) for the integrated signals from ESX-1 peptides and controls monitored in this study (Cell Lysates). Shown in green are the measured errors for the triplicate injections, in orange are the averages for each peptide/protein used in the figures.



## S6. Absolute Quantification Measured MRM peak areas for cell lysate and culture filtrate analysis

|                                           |                                |     |                            | mw       | Protein      |
|-------------------------------------------|--------------------------------|-----|----------------------------|----------|--------------|
| ESAT6                                     | ESAT6_LAAAWGGSGSEAYR.Heavy.T1  |     |                            | 1404.66  | 9913.73      |
| GroES                                     | GroES_EKPQEGTVVAVGPGR.Heavy.T1 |     |                            | 1532.81  | 10615.97     |
|                                           |                                |     |                            | 3ul/tube |              |
|                                           |                                |     | Amt (5ul) 1) Dil 1 fmol/ul | (fmol)   | 2) On-column |
| ESAT6                                     | Stock = 142uM                  | 710 | 710                        | 2130     | 213          |
| GroES                                     | Stock = 130uM                  | 650 | 650                        | 1950     | 195          |
| 1) 5ul into 1000                          |                                |     |                            |          |              |
| 2) Dried, resusp to 20ul, load 2ul LC/MRM |                                |     |                            |          |              |

| Transitions                |            |  |
|----------------------------|------------|--|
| ESAT6_LAAAWGGSGSEAYR.Light |            |  |
| Q1->465.9 Q3 682.3         | Quantifier |  |
| Q1->465.9 Q3 538.3         | Qualifier  |  |
| Q1->465.9 Q3 769.3         | Qualifier  |  |
| ESAT6_LAAAWGGSGSEAYR.Heavy |            |  |
| Q1->469.2 Q3 692.3         | Quantifier |  |
| Q1->469.9 Q3 548.3         | Qualifier  |  |
| Q1->469.9 Q3 779.3         | Qualifier  |  |

| Culture Filtrate |          |            |            |             |         |            |                  |             |            |            |       |             |            |  |  |
|------------------|----------|------------|------------|-------------|---------|------------|------------------|-------------|------------|------------|-------|-------------|------------|--|--|
| ESAT6 Light      |          |            |            | ESAT6 Heavy |         |            |                  | GroES Light |            |            |       | GroES Heavy |            |  |  |
| Endogenous       | AQUA     | L/H        | Endogenous | Stats       | fmol /  | ng per 1mg | Endogenous       | AQUA        | L/H        | Endogenous | Stats | fmol /      | ng per 1mg |  |  |
| Sample Name      | Area     | Area Ratio | (Fmol)     | Stats       | 500ng   | filtrate   | Sample Name      | Area        | Area Ratio | (Fmol)     | Stats | 500ng       | filtrate   |  |  |
| 500ng RD1 Soup 1 | 0.00E+00 | 2.16E+06   | 0.00E+00   | 0.00        | Average | 0.00       | 500ng RD1 Soup 1 | 7.47E+05    | 4.07E+07   | 1.84E-02   | 3.58  | Average     | 3.53       |  |  |
| 500ng RD1 Soup 1 | 0.00E+00 | 1.93E+06   | 0.00E+00   | 0.00        | StDev   | 0          | 500ng RD1 Soup 1 | 7.46E+05    | 4.08E+07   | 1.83E-02   | 3.57  | StDev       | 0.0757     |  |  |
| 500ng RD1 Soup 1 | 0.00E+00 | 2.09E+06   | 0.00E+00   | 0.00        | %CV     | N/A        | 500ng RD1 Soup 1 | 7.00E+05    | 3.97E+07   | 1.77E-02   | 3.44  | %CV         | 2.1%       |  |  |
| 500ng 14 Soup 1  | 1.19E+04 | 2.02E+06   | 5.89E-03   | 1.25        | Average | 1.43       | 500ng 14 Soup 1  | 5.06E+06    | 3.81E+07   | 1.33E-01   | 25.89 | Average     | 26.03      |  |  |
| 500ng 14 Soup 1  | 1.05E+04 | 1.65E+06   | 6.38E-03   | 1.36        | StDev   | 0.215      | 500ng 14 Soup 1  | 4.59E+06    | 3.36E+07   | 1.36E-01   | 26.58 | StDev       | 0.4985     |  |  |
| 500ng 14 Soup 1  | 1.25E+04 | 1.59E+06   | 7.83E-03   | 1.67        | %CV     | 15.1%      | 500ng 14 Soup 1  | 4.18E+06    | 3.18E+07   | 1.31E-01   | 25.61 | %CV         | 1.9%       |  |  |
| 500ng C2 Soup 1  | 1.46E+04 | 1.48E+06   | 9.83E-03   | 2.09        | Average | 2.01       | 500ng C2 Soup 1  | 4.18E+06    | 3.09E+07   | 1.35E-01   | 26.41 | Average     | 26.37      |  |  |
| 500ng C2 Soup 1  | 1.23E+04 | 1.22E+06   | 1.01E-02   | 2.14        | StDev   | 0.1867     | 500ng C2 Soup 1  | 3.57E+06    | 2.77E+07   | 1.29E-01   | 25.08 | StDev       | 1.2693     |  |  |
| 500ng C2 Soup 1  | 9.02E+03 | 1.07E+06   | 8.43E-03   | 1.80        | %CV     | 9.3%       | 500ng C2 Soup 1  | 3.49E+06    | 2.46E+07   | 1.42E-01   | 27.61 | %CV         | 4.8%       |  |  |
| 500ng WT Soup 1  | 3.05E+06 | 1.14E+06   | 2.68E+00   | 571.05      | Average | 532.71     | 500ng WT Soup 1  | 3.86E+06    | 2.69E+07   | 1.43E-01   | 27.98 | Average     | 27.59      |  |  |
| 500ng WT Soup 1  | 2.97E+06 | 1.24E+06   | 2.40E+00   | 510.14      | StDev   | 33.378     | 500ng WT Soup 1  | 4.10E+06    | 2.80E+07   | 1.46E-01   | 28.51 | StDev       | 1.1615     |  |  |
| 500ng WT Soup 1  | 3.13E+06 | 1.29E+06   | 2.43E+00   | 516.95      | %CV     | 6.3%       | 500ng WT Soup 1  | 3.90E+06    | 2.90E+07   | 1.35E-01   | 26.28 | %CV         | 4.2%       |  |  |

| Whole Cell Lysates |          |            |            |             |         |            |                    |             |            |            |        |             |            |  |  |
|--------------------|----------|------------|------------|-------------|---------|------------|--------------------|-------------|------------|------------|--------|-------------|------------|--|--|
| ESAT6 Light        |          |            |            | ESAT6 Heavy |         |            |                    | GroES Light |            |            |        | GroES Heavy |            |  |  |
| Endogenous         | AQUA     | L/H        | Endogenous | Stats       | fmol /  | ng per 1mg | Endogenous         | AQUA        | L/H        | Endogenous | Stats  | fmol /      | ng per 1mg |  |  |
| Sample Name        | Area     | Area Ratio | (Fmol)     | Stats       | 500ng   | WC Lysate  | Sample Name        | Area        | Area Ratio | (Fmol)     | Stats  | 500ng       | WC Lysate  |  |  |
| 500ng RD1 Pellet 1 | 0        | 1.33E+06   | 0.00E+00   | 0.00        | Average | 0.00       | 500ng RD1 Pellet 1 | 4.90E+07    | 3.04E+07   | 1.61E+00   | 314.53 | Average     | 296.23     |  |  |
| 500ng RD1 Pellet 1 | 0        | 1.15E+06   | 0.00E+00   | 0.00        | StDev   | 0          | 500ng RD1 Pellet 1 | 4.54E+07    | 3.02E+07   | 1.50E+00   | 292.56 | StDev       | 16.766     |  |  |
| 500ng RD1 Pellet 1 | 0        | 1.25E+06   | 0.00E+00   | 0.00        | %CV     | 0%         | 500ng RD1 Pellet 1 | 4.21E+07    | 2.92E+07   | 1.44E+00   | 281.61 | %CV         | 5.7%       |  |  |
| 500ng 14 Pellet 1  | 8.30E+05 | 1.15E+06   | 7.21E-01   | 153.65      | Average | 158.54     | 500ng 14 Pellet 1  | 5.19E+07    | 3.03E+07   | 1.71E+00   | 334.08 | Average     | 345.50     |  |  |
| 500ng 14 Pellet 1  | 8.43E+05 | 1.18E+06   | 7.12E-01   | 151.64      | StDev   | 10.255     | 500ng 14 Pellet 1  | 5.37E+07    | 3.04E+07   | 1.77E+00   | 344.31 | StDev       | 12.049     |  |  |
| 500ng 14 Pellet 1  | 7.81E+05 | 9.76E+05   | 8.00E-01   | 170.32      | %CV     | 6.5%       | 500ng 14 Pellet 1  | 4.92E+07    | 2.68E+07   | 1.84E+00   | 358.09 | %CV         | 3.5%       |  |  |
| 500ng C2 Pellet 1  | 8.71E+05 | 1.26E+06   | 6.92E-01   | 147.36      | Average | 151.38     | 500ng C2 Pellet 1  | 5.73E+07    | 3.15E+07   | 1.82E+00   | 354.58 | Average     | 354.90     |  |  |
| 500ng C2 Pellet 1  | 7.73E+05 | 1.05E+06   | 7.35E-01   | 156.60      | StDev   | 4.7339     | 500ng C2 Pellet 1  | 4.95E+07    | 2.76E+07   | 1.79E+00   | 349.14 | StDev       | 5.9334     |  |  |
| 500ng C2 Pellet 1  | 8.78E+05 | 1.25E+06   | 7.05E-01   | 150.19      | %CV     | 3.1%       | 500ng C2 Pellet 1  | 4.88E+07    | 2.64E+07   | 1.85E+00   | 360.99 | %CV         | 1.7%       |  |  |
| 500ng WT Pellet 1  | 1.40E+06 | 9.56E+05   | 1.47E+00   | 312.98      | Average | 293.94     | 500ng WT Pellet 1  | 4.56E+07    | 2.48E+07   | 1.84E+00   | 358.27 | Average     | 352.18     |  |  |
| 500ng WT Pellet 1  | 1.34E+06 | 1.02E+06   | 1.32E+00   | 281.62      | StDev   | 16.725     | 500ng WT Pellet 1  | 4.72E+07    | 2.65E+07   | 1.78E+00   | 346.93 | StDev       | 5.7192     |  |  |
| 500ng WT Pellet 1  | 1.43E+06 | 1.06E+06   | 1.35E+00   | 287.22      | %CV     | 5.7%       | 500ng WT Pellet 1  | 4.65E+07    | 2.58E+07   | 1.80E+00   | 351.33 | %CV         | 1.6%       |  |  |

Shown here are the peak areas (and peak area ratios) for the integrated signals from ESX-1 peptides and controls monitored in this study. This includes the Area ratios of the heavy-isotope internal standards to determine absolute ratios of ESX-1 substrates.

## S7. Absolute Quantification Measured MRM peak areas for colony extracts, (Surface Proteins).

|       |                          |  |           | mw               | Protein      |
|-------|--------------------------|--|-----------|------------------|--------------|
| ESAT6 | LAAAWGGSGSEAYR.Heavy.T1  |  |           | 1404.66          | 9913.73      |
| GroES | EKPQEGTVVAVGPGR.Heavy.T1 |  |           | 1532.81          | 10615.97     |
|       |                          |  |           | 3ul/tube         |              |
|       |                          |  | Amt (5ul) | 1) Dil 1 fmol/ul | 2) On-column |
| ESAT6 | Stock = 142uM            |  | 710       | 710              | 2130         |
| GroES | Stock = 130uM            |  | 650       | 650              | 1950         |

| Transitions                |          |            |
|----------------------------|----------|------------|
| ESAT6_LAAAWGGSGSEAYR.Light |          |            |
| Q1->465.9                  | Q3 682.3 | Quantifier |
| Q1->465.9                  | Q3 538.3 | Qualifier  |
| Q1->465.9                  | Q3 769.3 | Qualifier  |
| ESAT6_LAAAWGGSGSEAYR.Heavy |          |            |
| Q1->469.2                  | Q3 692.3 | Quantifier |
| Q1->469.9                  | Q3 548.3 | Qualifier  |
| Q1->469.9                  | Q3 779.3 | Qualifier  |

### Lysis Loading Correction Factors

RD1 is 1.66of WT  
 14 is 2.324 of WT  
 C2 is 1.37 of WT

\*Corrected to GroES, Ca 20-30ug protein obtained per colony wash

| Sample Name | ESAT6 Light |          |            | ESAT6 Heavy |         |            | ESAT6 Endogenous (Fmol) | Stats       | fmol / on-column | corrected ng per large colony* | Sample Name | GroES Light |           |            | GroES Heavy |          |            | GroES Endogenous (Fmol) | Stats | fmol / on-column | corrected ng per large colony* | Raw ng per large colony* |
|-------------|-------------|----------|------------|-------------|---------|------------|-------------------------|-------------|------------------|--------------------------------|-------------|-------------|-----------|------------|-------------|----------|------------|-------------------------|-------|------------------|--------------------------------|--------------------------|
|             | Area        | Area     | Area Ratio | Area        | Area    | Area Ratio |                         |             |                  |                                |             | Area        | Area      | Area Ratio | Area        | Area     | Area Ratio |                         |       |                  |                                |                          |
| 500ng RD1 1 | 0.00E+00    | 6.94E+05 | 0.00E+00   | 0.00        | Average | 0.00       | 0.00E+00                | 500ng RD1 1 | 1.61E+06         | 1.99E+07                       | 8.11E-02    | 10.54       | Average   | 10.26      | 1.97E+00    | 3.27E+00 |            |                         |       |                  |                                |                          |
| 500ng RD1 1 | 0.00E+00    | 6.71E+05 | 0.00E+00   | 0.00        | StDev   | 0          | 500ng RD1 1             | 1.52E+06    | 1.89E+07         | 8.03E-02                       | 10.44       | StDev       | 0.403368  |            |             |          |            |                         |       |                  |                                |                          |
| 500ng RD1 1 | 0.00E+00    | 5.99E+05 | 0.00E+00   | 0.00        | %CV     | N/A        | 500ng RD1 1             | 1.45E+06    | 1.92E+07         | 7.54E-02                       | 9.80        | %CV         | 3.9%      |            |             |          |            |                         |       |                  |                                |                          |
| 500ng 14 1  | 3.24E+05    | 5.33E+05 | 6.08E-01   | 86.29       | Average | 81.43      | 1.04E+01                | 500ng 14 1  | 1.81E+06         | 1.76E+07                       | 1.03E-01    | 13.41       | Average   | 14.37      | 1.97E+00    | 4.58E+00 |            |                         |       |                  |                                |                          |
| 500ng 14 1  | 2.59E+05    | 4.98E+05 | 5.20E-01   | 73.88       | StDev   | 6.624001   | 500ng 14 1              | 1.70E+06    | 1.41E+07         | 1.21E-01                       | 15.70       | StDev       | 1.1898182 |            |             |          |            |                         |       |                  |                                |                          |
| 500ng 14 1  | 3.03E+05    | 5.12E+05 | 5.92E-01   | 84.11       | %CV     | 8.1%       | 500ng 14 1              | 1.74E+06    | 1.61E+07         | 1.08E-01                       | 13.98       | %CV         | 8.3%      |            |             |          |            |                         |       |                  |                                |                          |
| 500ng C2 1  | 2.96E+05    | 5.26E+05 | 5.64E-01   | 80.05       | Average | 82.58      | 1.79E+01                | 500ng C2 1  | 1.17E+06         | 1.67E+07                       | 7.02E-02    | 9.12        | Average   | 8.47       | 1.97E+00    | 2.70E+00 |            |                         |       |                  |                                |                          |
| 500ng C2 1  | 3.01E+05    | 5.54E+05 | 5.43E-01   | 77.05       | StDev   | 7.136588   | 500ng C2 1              | 1.11E+06    | 1.65E+07         | 6.75E-02                       | 8.78        | StDev       | 0.8389124 |            |             |          |            |                         |       |                  |                                |                          |
| 500ng C2 1  | 9.98E+03    | 1.56E+04 | 6.38E-01   | 90.63       | %CV     | 8.6%       | 500ng C2 1              | 4.50E+03    | 7.77E+04         | 5.79E-02                       | 7.53        | %CV         | 9.9%      |            |             |          |            |                         |       |                  |                                |                          |
| 500ng WT 1  | 4.50E+05    | 7.45E+05 | 6.04E-01   | 85.75       | Average | 79.33      | 2.37E+01                | 500ng WT 1  | 9.56E+05         | 2.11E+07                       | 4.54E-02    | 5.90        | Average   | 6.18       | 1.97E+00    | 1.97E+00 |            |                         |       |                  |                                |                          |
| 500ng WT 1  | 3.95E+05    | 7.26E+05 | 5.44E-01   | 77.22       | StDev   | 5.138667   | 500ng WT 1              | 9.63E+05    | 2.07E+07         | 4.64E-02                       | 6.03        | StDev       | 0.374591  |            |             |          |            |                         |       |                  |                                |                          |
| 500ng WT 1  | 3.85E+05    | 7.14E+05 | 5.39E-01   | 76.53       | %CV     | 6.4%       | 500ng WT 1              | 9.67E+05    | 1.90E+07         | 5.08E-02                       | 6.61        | %CV         | 6.1%      |            |             |          |            |                         |       |                  |                                |                          |

Shown here are the peak areas (and peak area ratios) for the integrated signals from ESX-1 peptides and controls monitored in this from colony extracts. This includes the Area ratios of the heavy-isotope internal standards to determine absolute ratios of ESX-1 substrates. Shown in peach are the correction factors used for GroES (Confirmed with GroEL) used to normalize protein response between the colonies.
